# Supplementary material
Source: PubMed Central journal article supplement (PMC3690995)

FIG. S2. Generic diversity of the sapindaceous clade per area. For each area, numbers separated by back slashes are as follows: number of endemic genera; number of monotypic endemic genera (e.g. A 9/6). The number of genera and their distribution is based on Buerki *et al.* (2009). See Figs 1 and 3 for abbreviations on areas.

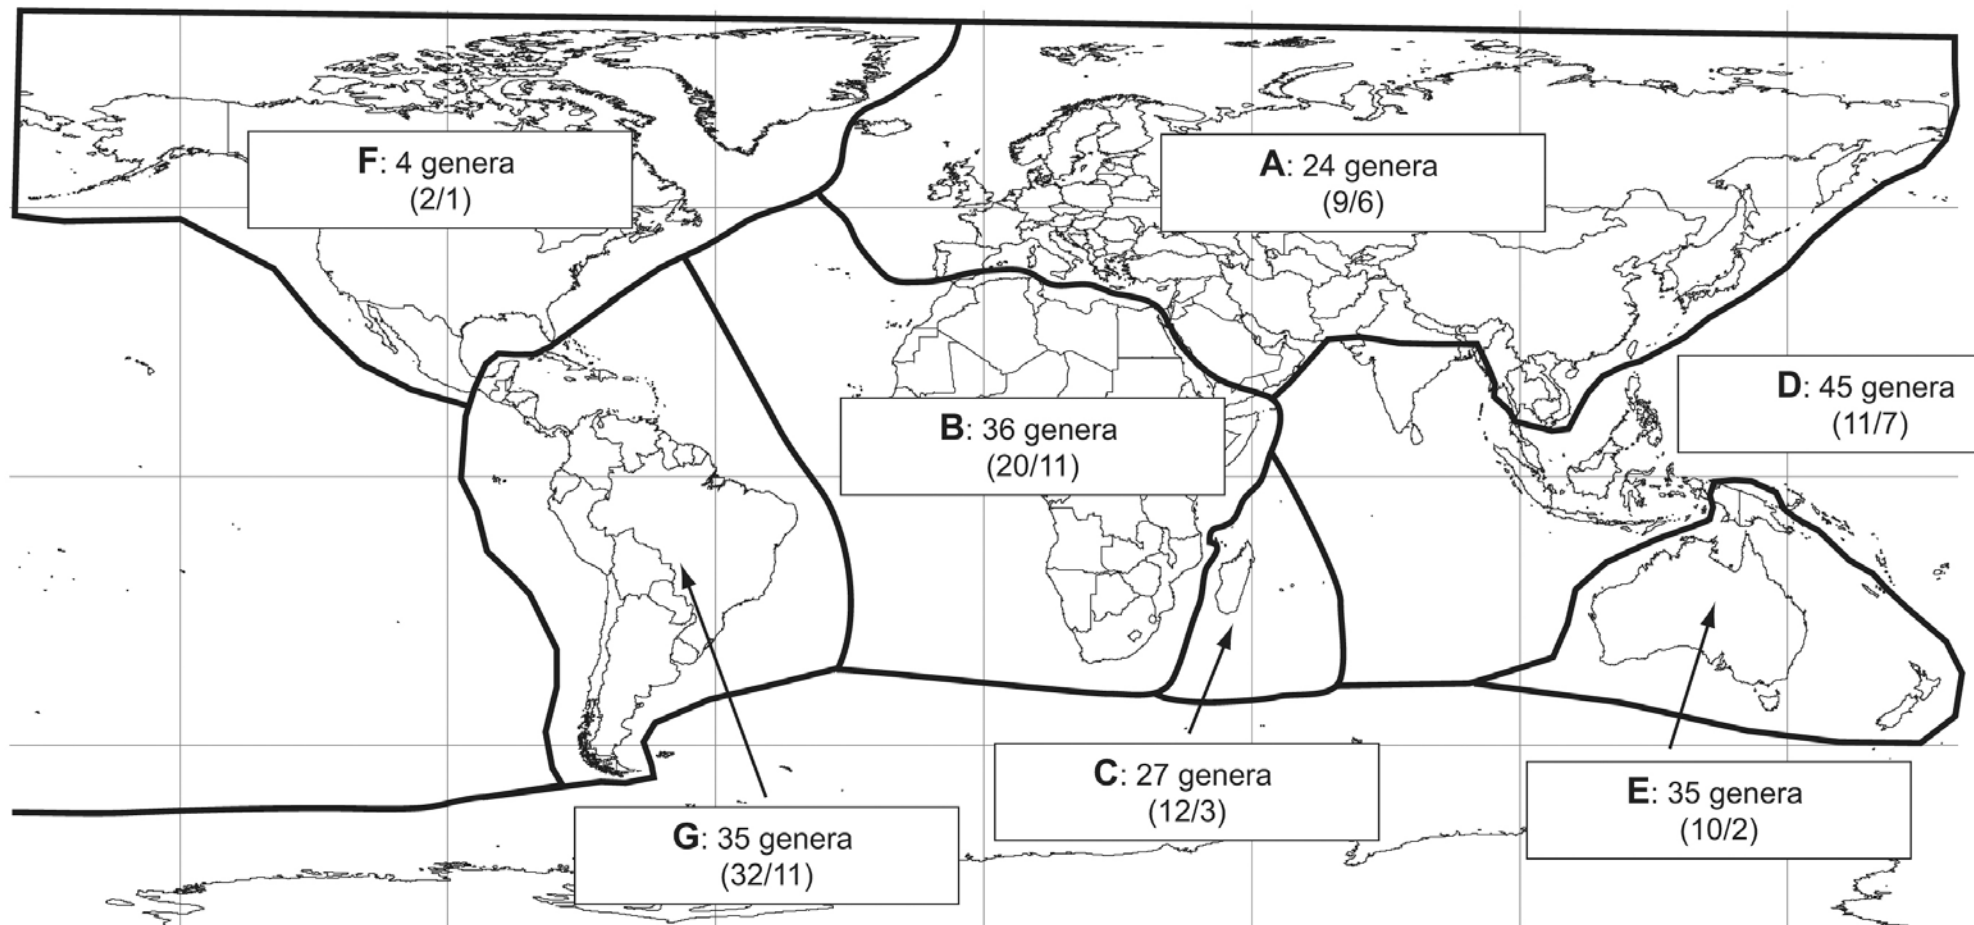

Supplement: supp_mct106_mct106supp.pdf [file supp_mct106_mct106supp.pdf]
